# Supplementary material
Source: publisher figshare collection journal article supplement (https://acs.figshare.com/ndownloader/files/3819892)
Supplement: Supplementary file 1 [file 3819892]

# Supporting Information

## Photochemical transformation of graphene oxide in sunlight

Wen-Che Hou<sup>\*,†,⊥</sup>, Indranil Chowdhury<sup>‡</sup>, David G. Goodwin Jr.<sup>‡</sup>, Matthew Henderson<sup>§</sup>, Howard  
Fairbrother<sup>‡</sup>, Dermont Bouchard<sup>§</sup>, Richard G. Zepp<sup>\*,§</sup>

<sup>†</sup>National Research Council Associate, National Exposure Research Laboratory, Ecosystems Research  
Division, U. S. Environmental Protection Agency, Athens, GA, 30605

<sup>⊥</sup>Department of Environmental Engineering, National Cheng Kung University, Tainan City, Taiwan,  
70101

<sup>‡</sup>Department of Chemistry, Johns Hopkins University, Baltimore, MD 21218

<sup>§</sup>National Exposure Research Laboratory, Ecosystems Research Division, U. S. Environmental Protection  
Agency, Athens, GA, 30605

\*Address correspondence to either author. Phone: +886 62757575 ext.65842 (W. C. H.). (706)  
355-8117, Fax: +886 6 2752790 (W. C. H.), (706) 355-8007 (R. G. Z.), E-mail: [whou@mail.ncku.edu.tw](mailto:whou@mail.ncku.edu.tw)  
(W. C. H.); [Richard.Zepp@epa.gov](mailto:Richard.Zepp@epa.gov) (R. G. Z.).

**Manuscript prepared for publication in:** Environmental Science & Technology

**Pages:** 13

**Figures:** S1-6

**Table:** S1

## 23 **Procedure for dissolved oxygen level studies**

24 We examined the effect of dissolved oxygen (DO) level on GO's photoreactivity under  
25 air-equilibrated and O<sub>2</sub>-deficient conditions. To create O<sub>2</sub>-deficient samples, we removed dissolved O<sub>2</sub>  
26 from GO samples by bubbling pure N<sub>2</sub> gas into the tubes for 1 h prior to irradiation. N<sub>2</sub> bubbling was  
27 performed by penetrating a needle through the septa and below the liquid surface; another needle above  
28 the liquid surface equated pressure in the tubes with the atmosphere above the septa.

## 29 **Method for Measuring CO<sub>2</sub> evolved from GO during photolysis**

30 To measure CO<sub>2</sub> that evolved during irradiation, atmospheric CO<sub>2</sub> was removed by bubbling  
31 solutions with CO<sub>2</sub>-free air or CO<sub>2</sub>-free N<sub>2</sub> as described above to examine the effect of DO. While  
32 gas-bubbling with CO<sub>2</sub>-free air or CO<sub>2</sub>-free N<sub>2</sub> lowered the inorganic carbon (IC) level, it was still  
33 detectable in the dark control samples, although the concentration was significantly smaller than in  
34 irradiated samples. To measure the CO<sub>2</sub> produced, a 3-mL aliquot of headspace from the quartz tube was  
35 analyzed using gas chromatography (GC). The total inorganic carbon species concentration was  
36 calculated, accounting for gaseous CO<sub>2</sub> in the headspace, dissolved CO<sub>2</sub>, bicarbonate, and carbonate; pH  
37 values were measured in samples not intended for CO<sub>2</sub> analysis.

38 CO<sub>2</sub> measurements were performed on an Agilent 6890 gas chromatograph (GC) equipped with a  
39 thermal-conductivity detector (TCD). Headspace samples were separated using a Hayesep DB packed  
40 column (30 m × 0.125 mm × 80/100 mesh; Supelco Analytical, St. Louis, MO) with helium maintained  
41 at a constant flow of 30 mL/min as the carrier gas. The inlet temperature was 105 °C and the initial  
42 oven temperature of 70 °C was held for 8 min, then ramped to 150 °C at 80 °C/min and held for an  
43 additional 7 min.

## 44 **Procedure for photoproduct preparation**

45 Separate experiments to prepare sufficient GO photoproducts for characterizations used large  
46 volumes (0.7 L) of 40 mg/L GO samples that were irradiated in a similar manner as described earlier for  
47 various time periods under air- or N<sub>2</sub>-equilibrated condition. After irradiation, samples were

48 vacuum-concentrated and freeze-dried.

## 49 **Characterizations of GO photoproducts**

50 **Mass spectrometry:** This procedure was used to determine the low molecular-weight products  
51 formed during GO photolysis. Aqueous GO samples before and after light irradiation were passed  
52 through 0.2  $\mu\text{m}$  filters. The filtrates were collected and diluted 1:1 (v/v) with acetonitrile and fortified  
53 with 0.1% formic acid before direct infusion into a Thermo Quantum Ultra mass spectrometer equipped  
54 with an ESI source (Thermo Fisher Scientific). Full scan mass spectra were acquired over the range of  
55 50 to 1200 m/z in positive ion mode for 5 min. The spray voltage was maintained at 3.5 kV, capillary  
56 temperature was 275  $^{\circ}\text{C}$  and the sheath and auxiliary gas pressures were 30 and 15 arbitrary units,  
57 respectively. Following full scan acquisition, neutral loss scans were acquired over the range of  
58 50-500 m/z to investigate the loss of 17, 18, and 28 m/z using a collision pressure of 1.5 mTorr and  
59 collision energy of -20 eV.

60 **UV-Visible absorbance:** A Perkin Elmer Lambda 35 UV-visible absorbance spectrophotometer  
61 equipped with a 1-cm light path quartz cuvette was used to follow the progress of GO photoreactions.  
62 Dissolved organic carbon (DOC): DOC concentrations were quantitated by a Shimadzu TOC-VCPH  
63 carbon analyzer.

64 **Fluorescence:** We used a Horiba Fluorolog 3-221 spectrofluorometer with a 1-cm light path quartz  
65 cuvette to characterize photoluminescence (PL) of GO samples before and after irradiation. Scans were  
66 corrected for the instruments configuration and converted into quinine sulfate equivalents. We  
67 post-processed data to remove the Raman and Raleigh scattering peaks with an in-house Fluorescence  
68 Toolbox (version 2.0).<sup>1</sup> The reported fluorescent intensity was corrected for the inner filter effect using  
69 the method described by Gauthier et al.<sup>2</sup> Since the PL intensity reported in the study is corrected for  
70 screening of excitation and emission light by the sample absorbance values, the values are reflective of  
71 the intrinsic PL of samples.

72 **Raman:** A Renishaw inVia Raman spectrophotometer equipped with 532-nm laser recorded the

73 Raman spectra. Samples for Raman spectroscopy were prepared by air-drying a few drops of GO  
74 samples on copper foils.

75 **X-ray Photoelectron Spectroscopy (XPS):** For XPS analysis, approximately 3 mg of each GO  
76 irradiated sample was dusted onto copper tape ( $0.5 \times 0.5 \text{ cm}^2$ ) until it was completely covered.  
77 Samples were loaded into a PHI 5600 XPS system ( $P_{\text{base}} < 5 \times 10^{-9}$  Torr) and analyzed using Mg K $\alpha$   
78 X-rays (1253.6 eV, 15 kV, 300 W) and a high energy electron energy analyzer operating at a constant  
79 pass-energy of 58.7 eV with a scan rate of 0.125 eV/step (50 ms/step). XP spectra were processed by  
80 commercially available software (CasaXPS). The concentrations of oxygen-containing functional  
81 groups were determined from each sample by peak-fitting the C (1s) region, taking advantage of clearly  
82 discernible peaks due to GO's large oxygen-to-carbon ratio. For component-fitting of the C(1s) region,  
83 each spectrum was given a Shirley background and energy-adjusted to the CC/CH fitted spectral feature  
84 within the C (1s) region at 284.5 eV. Spectra of the dark control and irradiated samples were fitted  
85 with CC/CH, C-O, C=O, and O-C=O features. The CC/CH peak position was set at 284.5 eV and  
86 FWHM determined by fitting the C (1s) region of the most photo-reduced GO samples which had the  
87 most intense CC/CH component (see Figure 3). Based on reports in the literature, the C-O peak was  
88 determined to be 286.8 eV and the FWHM determined by analyzing native GO samples where C-O  
89 species are the dominant feature (see Figure 3). The C=O (287.7 eV) and O-C=O (289.1 eV) features  
90 were determined from average peak positions used in the literature for GO,<sup>3-7</sup> and within a  $\pm 0.2$  eV  
91 range of the C=O and O-C=O values used in reference polymers from Briggs et al. (polyvinyl methyl  
92 ketone (PVMK) at 287.97 eV and polymethyl methacrylate (PMMA) at 289.03 eV, respectively).<sup>8</sup>  
93 Peak positions and FWHM values for all components were allowed to drift no more than  $\pm 0.2$  eV of the  
94 peak position for all samples analyzed.

95 **Attenuated total reflectance infrared spectroscopy (ATR-IR):** ATR-IR monitored changes in  
96 distribution of oxygen functional groups on GO following irradiation. All spectra were acquired using a  
97 Thermo Scientific Nicolet iS5 ATR-IR with a diamond crystal and a dTGS room-temperature detector

98 (< 0.8 cm<sup>-1</sup> resolution). Five hundred scans were taken for each IR spectrum obtained.

99       **Dynamic Light Scattering (DLS):** The hydrodynamic diameter and zeta potential were  
100 determined by a DLS particle sizer (Malvern Zetasizer Nano-ZS).

101       **Atomic Force Microscopy (AFM):** Physical dimensions of photo-transformed GO were  
102 determined from images taken by a Veeco Multimode AFM with a Nanoscope V controller and an E  
103 scanner (Bruker AXC Inc., Madison, WI). Samples for AFM imaging were prepared on  
104 positively-charged poly-*L*-lysine hydrobromide-coated Si wafers. Images were taken under  
105 ScanAsyst-Air mode with a Silicon Nitride cantilever (ScanAsyst-Air, Bruker AXC Inc., Madison, WI).  
106 AFM images were further analyzed for distribution of thickness, diameter and surface area using  
107 Nanoscope Analysis software (Bruker AXC Inc., Madison, WI).

108

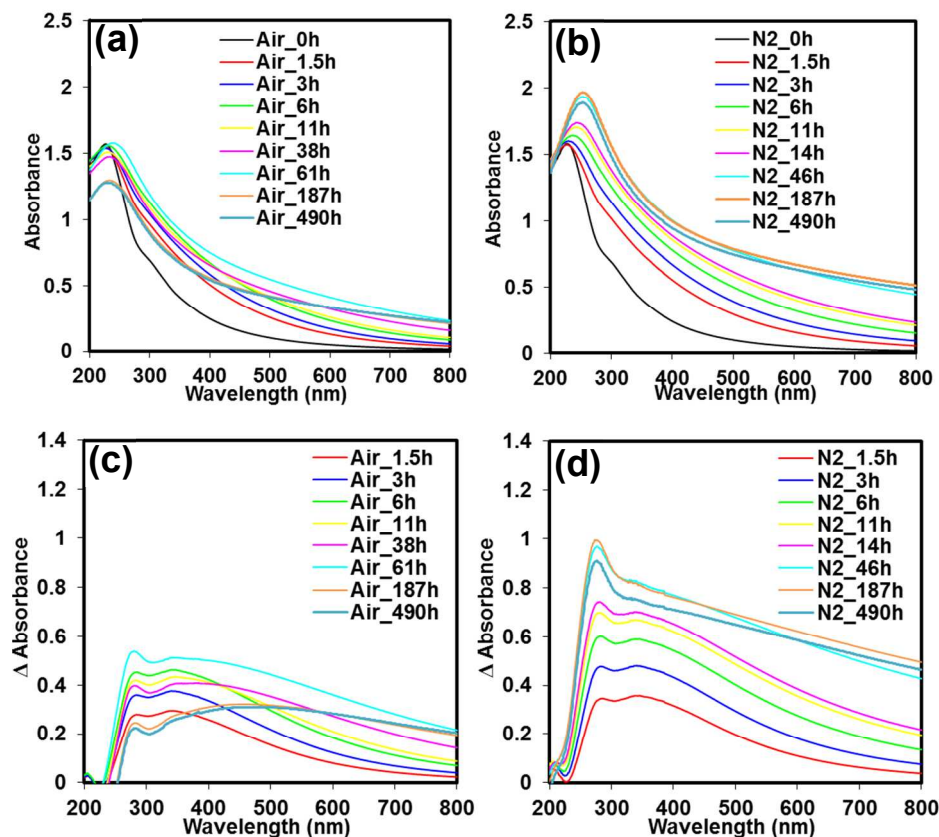

**Figure S1.** UV-visible absorbance spectra of GO before and after sunlight irradiation, showing time-dependent changes in absorbance of (a) air-equilibrated samples and (b) N<sub>2</sub>-saturated samples, as well as the corresponding difference in spectra of (c) air-equilibrated samples and (d) N<sub>2</sub>-saturated samples. The difference spectra presented in (c) and (d) are obtained by subtracting absorbance value of the dark control sample (parent GO) from absorbance values of samples exposed to sunlight.

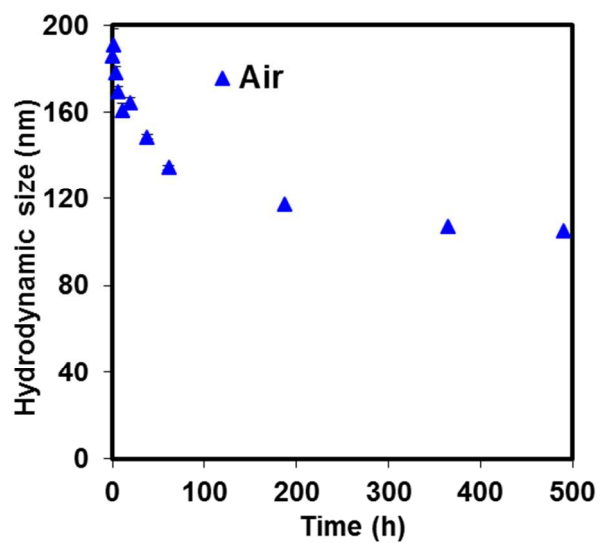

**Figure S2.** Hydrodynamic size evolution of air-equilibrated samples under simulated sunlight exposure.

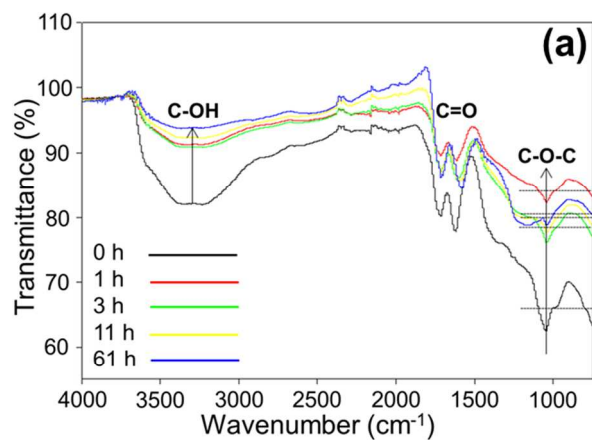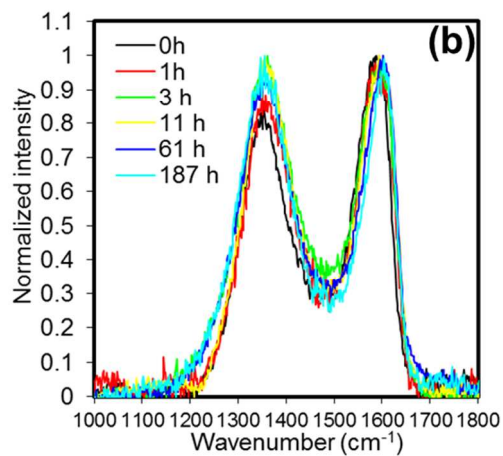

**Figure S3.** Spectral changes of air-saturated GO samples with sunlight exposure, showing (a) ATR-IR spectra, and (b) Raman spectra of photo-transformed GO products.



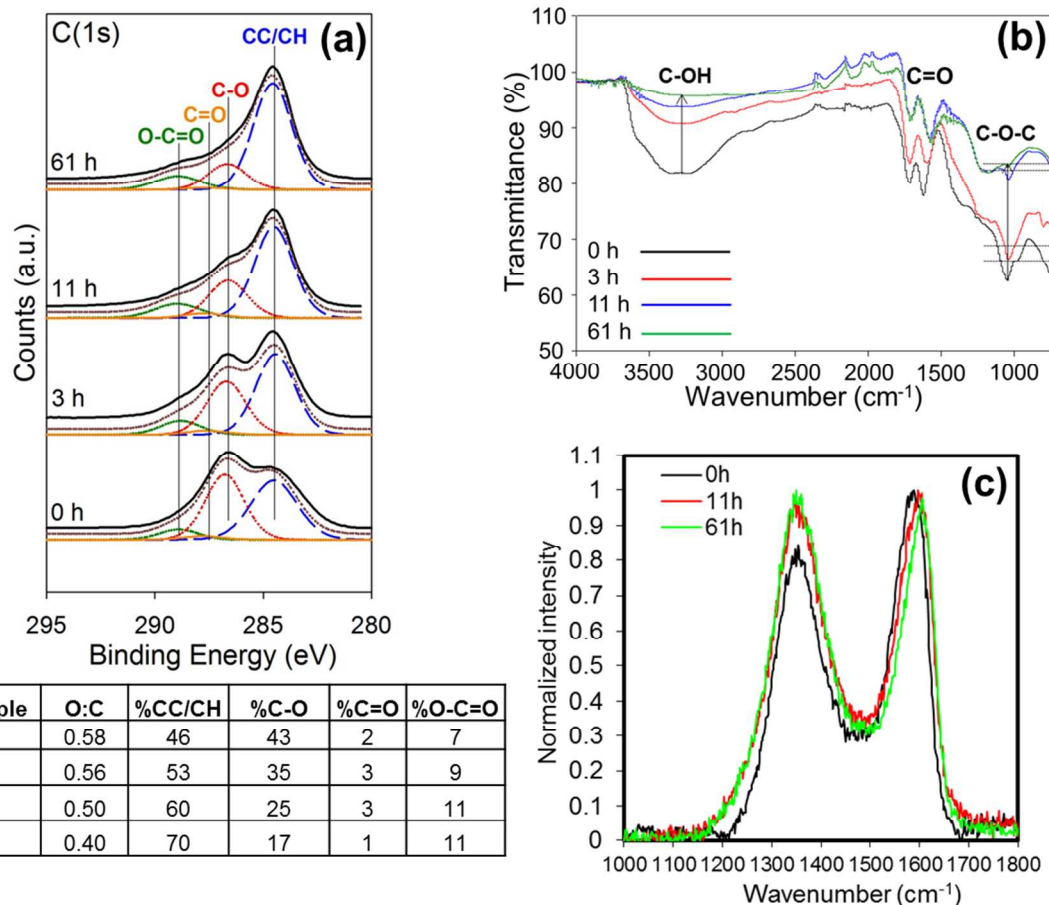

**Figure S4.** Spectral changes of  $N_2$ -saturated GO samples with sunlight exposure, showing (a) XPS spectra, (b) ATR-IR spectra, and (c) Raman spectra of photo-transformed GO products. The table shows changes in the oxygen-to-carbon ratio and functional groups of GO samples during irradiation.

$N_2$ -saturated GO samples also lost significant oxygen-containing groups, decreasing from ~52% to ~29% for total % O after 61 h of irradiation, compared to the decrease from ~52% to ~34% in air-equilibrated samples after irradiation for the same period. XPS, ATR-IR, and Raman spectra (Figure S4a-c) collectively show GO photoproducts formed in  $N_2$ -saturated samples are similar to those in air-equilibrated samples (Figure 4 and Figure S3).

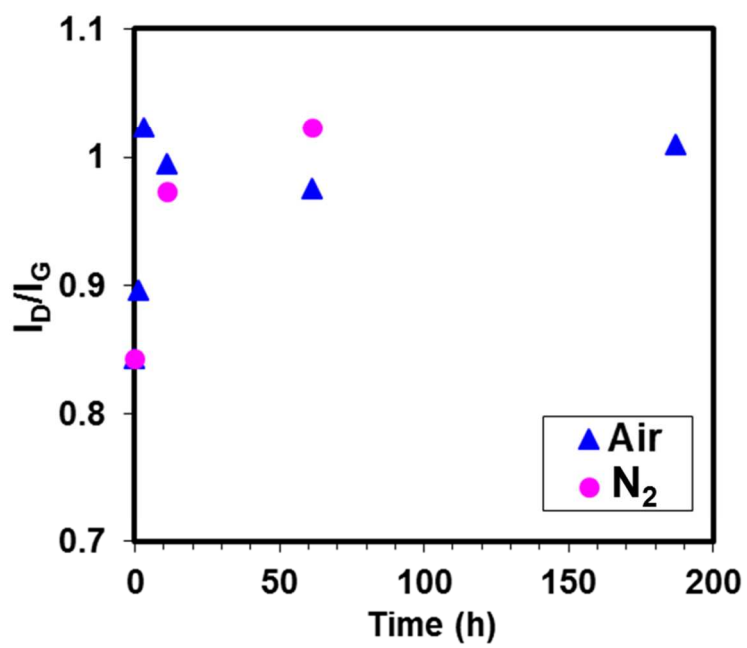

**Figure S5.**  $I_D/I_G$  ratio of GO samples as a function of irradiation time.

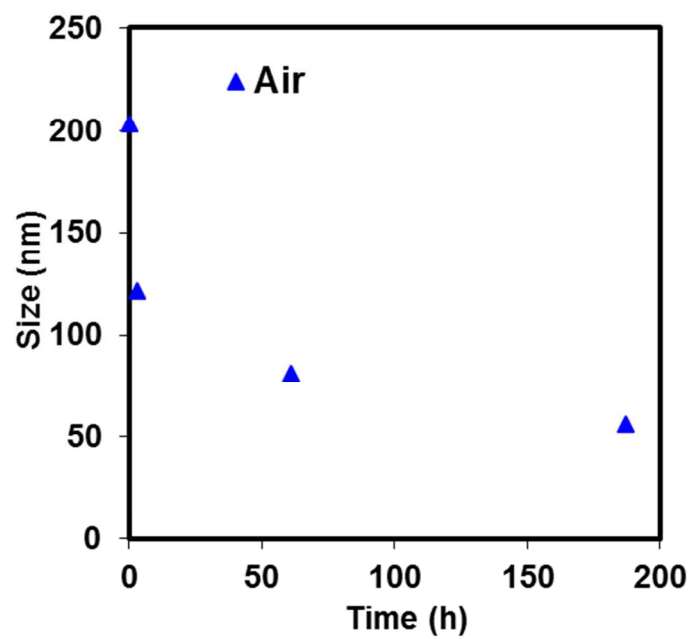

**Figure S6.** Size changes revealed by AFM images of samples before and after light irradiation. The data shown here are from the images reported in Figure 1d-g.

142 **Table S1.** Summary of the kinetics for changes in functional groups of GO samples irradiated under  
 143 sunlight.

| Functionality | condition      | $k_{obs}$ (h <sup>-1</sup> ) | R <sup>2</sup> |
|---------------|----------------|------------------------------|----------------|
| C-O           | Air            | 0.0097 ± 0.0108              | 0.73           |
|               | N <sub>2</sub> | 0.0128 ± 0.0184              | 0.82           |
| CC/CH         | Air            | 0.0039 ± 0.0056              | 0.62           |
|               | N <sub>2</sub> | 0.0054 ± 0.0085              | 0.79           |
| C=O           | Air            | 0.0058 ± 0.0086              | 0.22           |
|               | N <sub>2</sub> | 0.0133 ± 0.0182              | 0.83           |
| O-C=O         | Air            | 0.0068 ± 0.007               | 0.76           |
|               | N <sub>2</sub> | 0.0046 ± 0.0194              | 0.34           |

144

145

146

## References

- (1) Zepp, R. G.; Sheldon, W. M.; Moran, M. A. Dissolved organic fluorophores in southeastern US coastal waters: correction method for eliminating Rayleigh and Raman scattering peaks in excitation–emission matrices. *Marine Chemistry* **2004**, *89*, 15–36.
- (2) Gauthier, T. D.; Shane, E. C.; Guerin, W. F.; Seitz, W. R.; Grant, C. L. Fluorescence quenching method for determining equilibrium constants for polycyclic aromatic hydrocarbons binding to dissolved humic materials. *Environ. Sci. Technol.* **1986**, *20*, 1162–1166.
- (3) Matsumoto, Y.; Koinuma, M.; Ida, S.; Hayami, S.; Taniguchi, T.; Hatakeyama, K.; Tateishi, H.; Watanabe, Y.; Amano, S. Photoreaction of Graphene Oxide Nanosheets in Water. *J. Phys. Chem. C*.
- (4) Matsumoto, Y.; Koinuma, M.; Kim, S. Y.; Watanabe, Y.; Taniguchi, T.; Hatakeyama, K.; Tateishi, H.; Ida, S. Simple Photoreduction of Graphene Oxide Nanosheet under Mild Conditions. *ACS Appl. Mater. Interfaces* **2010**, *2*, 3461–3466.
- (5) Chandra, V.; Park, J.; Chun, Y.; Lee, J. W.; Hwang, I.-C.; Kim, K. S. Water-Dispersible Magnetite-Reduced Graphene Oxide Composites for Arsenic Removal. *ACS Nano* **2010**, *4*, 3979–3986.
- (6) Guardia, L.; Villar-Rodil, S.; Paredes, J. I.; Rozada, R.; Martínez-Alonso, A.; Tascón, J. M. D. UV light exposure of aqueous graphene oxide suspensions to promote their direct reduction, formation of graphene–metal nanoparticle hybrids and dye degradation. *Carbon* **2012**, *50*, 1014–1024.
- (7) Huang, H.; Xia, Y.; Tao, X.; Du, J.; Fang, J.; Gan, Y.; Zhang, W. Highly efficient electrolytic exfoliation of graphite into graphene sheets based on Li ions intercalation–expansion–microexplosion mechanism. *J. Mater. Chem.* **2012**, *22*, 10452–10456.
- (8) Briggs, D.; Beamson, G. Primary and secondary oxygen-induced C1s binding energy shifts in x-ray photoelectron spectroscopy of polymers. *Anal. Chem.* **1992**, *64*, 1729–1736.
